# Supplementary material for: ER Stress in COVID-19 and Parkinson’s Disease: In Vitro and In Silico Evidences
Source: MDPI journal article supplement (doi:10.3390/brainsci12040507), 2022-04-16
Supplement: s1 [file s1]

## Supplementary Material

**Table S1.** Determining the effect of salubrinol and zVADfmk in stressed dDCNs.

|                      | Mean not treated | Mean salubrinol | Mean zVADfmk | Mean 6OHDA | Mean 6OHDA & zVADfmk | Mean 6OHDA & salubrinol | Mean 6OHDA & salubrinol & zVADfmk |
|----------------------|------------------|-----------------|--------------|------------|----------------------|-------------------------|-----------------------------------|
| Mean of Assay 1      | 1.98             | 1.87            | 1.89         | 0.65       | 1.18                 | 1.50                    | 1.82                              |
| Mean of Assay 2      | 1.85             | 1.75            | 1.76         | 0.56       | 1.06                 | 1.51                    | 1.68                              |
| Mean of Assay 3      | 2.05             | 1.94            | 1.99         | 0.61       | 1.08                 | 1.55                    | 1.84                              |
| Mean of All Assays   | 1.96             | 1.85            | 1.88         | 0.61       | 1.11                 | 1.52                    | 1.78                              |
| Mean of All Assays % | 100              | 94              | 96           | 31         | 56                   | 78                      | 91                                |
| SD                   | 0.10             | 0.09            | 0.11         | 0.05       | 0.06                 | 0.03                    | 0.09                              |
| (n)                  | 3.00             | 3.00            | 3.00         | 3.00       | 3.00                 | 3.00                    | 3.00                              |
| SQR                  | 1.73             | 1.73            | 1.73         | 1.73       | 1.73                 | 1.73                    | 1.73                              |
| SE                   | 0.06             | 0.05            | 0.07         | 0.03       | 0.04                 | 0.02                    | 0.05                              |
| SE %                 | 5.74             | 5.47            | 6.59         | 2.67       | 3.58                 | 1.68                    | 5.07                              |
| T Test               |                  |                 |              |            | 0.001                | 0.00004                 | 0.00012                           |

**Table S2.** Determining if caspase-2 is active in ER stress pathway in 6OHDA-treated dDCNs.

|                      | Mean untreated | Mean salubrinol | Mean zVADfmk | Mean 6OHDA | Mean 6OHDA & salubrinol | Mean 6OHDA & zVADfmk | Mean 6OHDA & salubrinol & zVADfmk |
|----------------------|----------------|-----------------|--------------|------------|-------------------------|----------------------|-----------------------------------|
| Mean of Assay 1      | 2.08           | 2.13            | 2.10         | 0.65       | 1.44                    | 1.52                 | 1.51                              |
| Mean of Assay 2      | 2.18           | 2.19            | 2.14         | 0.55       | 1.27                    | 1.39                 | 1.52                              |
| Mean of Assay 3      | 2.12           | 2.11            | 2.15         | 0.73       | 1.46                    | 1.35                 | 1.48                              |
| Mean of All Assays   | 2.13           | 2.14            | 2.13         | 0.64       | 1.39                    | 1.42                 | 1.50                              |
| Mean of All Assays % | 100            | 101             | 100          | 30         | 65                      | 67                   | 71                                |
| SD                   | 0.048          | 0.041           | 0.027        | 0.087      | 0.104                   | 0.090                | 0.023                             |
| (n)                  | 3              | 3               | 3            | 3          | 3                       | 3                    | 3                                 |
| SQR                  | 1.73           | 1.73            | 1.73         | 1.73       | 1.73                    | 1.73                 | 1.73                              |
| SE                   | 0.028          | 0.023           | 0.016        | 0.050      | 0.060                   | 0.052                | 0.013                             |
| SE %                 | 2.755          | 2.348           | 1.557        | 5.031      | 6.026                   | 5.214                | 1.313                             |
| T Test               |                |                 |              |            | 0.001                   | 0.0004               | 0.002                             |
|                      |                |                 |              |            |                         | 0.716                |                                   |
|                      |                |                 |              |            |                         | 0.199                | 0.257                             |

**Table S3.** : Determining the Amount of caspase-2 in Salubrinol + 6OHDA-treated dDCNs.

|                      | Mean untreated | Mean salubrinol | Mean 6OHDA | Mean 6OHDA & salubrinol |
|----------------------|----------------|-----------------|------------|-------------------------|
| Caspase-2 Assay 1    | 1.069          | 0.000           | 1.702      | 0                       |
| Caspase-2 Assay 2    | 1.117          | 0.000           | 1.604      | 0                       |
| Caspase-2 Assay 3    | 0.959          | 0.000           | 1.746      | 0                       |
| Caspase-2 Assay 4    | 0.529          | 0.000           | 1.529      | 0                       |
| Caspase-2 Assay 5    | 0.421          | 0.000           | 2.416      | 0                       |
| Mean of All Assays   | 0.819          | 0.000           | 1.799      | 0.000                   |
| Mean of All Assays % | 100            | 0               | 220        | 0                       |
| SD                   | 0.321          | 0.000           | 0.355      | 0.000                   |

|        |       |      |       |      |
|--------|-------|------|-------|------|
| SD (%) | 32.13 | 0.00 | 35.48 | 0.00 |
| T Test |       |      | 0.02  |      |

**Table S4.** Determining if caspase-4 is active in ER stress pathway in 6OHDA-treated dDCNs.

|                      | Mean untreated | Mean salubrintal | Mean zLEVDFmk | Mean 6OHDA | Mean 6OHDA & salubrintal | Mean 6OHDA & zLEVDFmk | Mean 6OHDA & salubrintal & zLEVDFmk |
|----------------------|----------------|------------------|---------------|------------|--------------------------|-----------------------|-------------------------------------|
| Mean of Assay 1      | 2.03           | 2.02             | 2.10          | 0.72       | 1.43                     | 1.22                  | 1.57                                |
| Mean of Assay 2      | 2.03           | 2.07             | 2.11          | 0.67       | 1.38                     | 1.26                  | 1.61                                |
| Mean of Assay 3      | 2.04           | 2.05             | 2.06          | 0.60       | 1.36                     | 1.17                  | 1.54                                |
| Mean of All Assays   | 2.03           | 2.05             | 2.09          | 0.66       | 1.39                     | 1.22                  | 1.57                                |
| Mean of All Assays % | 100            | 101              | 103           | 33         | 68                       | 60                    | 77                                  |
| SD                   | 0.010          | 0.025            | 0.025         | 0.059      | 0.036                    | 0.045                 | 0.036                               |
| (n)                  | 3              | 3                | 3             | 3          | 3                        | 3                     | 3                                   |
| SQR                  | 1.73           | 1.73             | 1.73          | 1.73       | 1.73                     | 1.73                  | 1.73                                |
| SE                   | 0.006          | 0.014            | 0.015         | 0.034      | 0.021                    | 0.026                 | 0.021                               |
| SE %                 | 0.585          | 1.437            | 1.461         | 3.391      | 2.101                    | 2.578                 | 2.057                               |
| T Test               |                |                  |               |            | 0.0002                   | 0.0003                | 0.0001                              |
|                      |                |                  |               |            | 0.007                    |                       |                                     |
|                      |                |                  |               |            |                          | 0.004                 | 0.001                               |

**Table S5.** Determining the amount of caspase-4 in salubrintal-treated 6OHDA dDCNs.

|                      | Mean untreated | Mean salubrintal | Mean 6OHDA | MEAN 6OHDA & SALUBRINAL |
|----------------------|----------------|------------------|------------|-------------------------|
| Caspase-4 Assay 1    | 1.117          | 1.100            | 1.520      | 0.978                   |
| Caspase-4 Assay 2    | 0.942          | 0.965            | 1.356      | 1.057                   |
| Caspase-4 Assay 3    | 1.164          | 1.134            | 1.468      | 1.576                   |
| Caspase-4 Assay 4    | 0.586          | 1.637            | 2.545      | 3.223                   |
| Caspase-4 Assay 5    | 1.117          | 0.657            | 1.348      | 1.295                   |
| Mean of All Assays   | 0.985          | 1.099            | 1.647      | 1.626                   |
| Mean of All Assays % | 100            | 112              | 167        | 165                     |
| SD                   | 0.239          | 0.355            | 0.507      | 0.325                   |
| SD (%)               | 23.89          | 35.50            | 50.71      | 32.51                   |
| T Test               |                |                  | 0.04       | 0.965                   |

**Table S6.** Determining if caspase-8 is active in ER stress pathway of 6OHDA-treated dDCNs.

|                      | Mean Untreated | Mean salubrintal | Mean zIETD fmk | Mean 6OHDA | Mean 6OHDA & zIETDfmk | Mean 6OHDA & salubrintal | MeanN 6OHDA & salubrintal & zIETDfmk |
|----------------------|----------------|------------------|----------------|------------|-----------------------|--------------------------|--------------------------------------|
| Mean of Assay 1      | 2.14           | 2.14             | 2.15           | 0.67       | 1.48                  | 1.26                     | 1.76                                 |
| Mean of Assay 2      | 2.16           | 2.12             | 2.12           | 0.67       | 1.51                  | 1.32                     | 1.78                                 |
| Mean of Assay 3      | 1.99           | 2.04             | 2.10           | 0.67       | 1.57                  | 1.36                     | 1.83                                 |
| Mean of All Assays   | 2.10           | 2.10             | 2.12           | 0.67       | 1.52                  | 1.31                     | 1.79                                 |
| Mean of All Assays % | 100            | 100              | 101            | 32         | 72                    | 63                       | 85                                   |
| SD                   | 0.09           | 0.05             | 0.02           | 0.00       | 0.05                  | 0.05                     | 0.04                                 |
| (n)                  | 3              | 3                | 3              | 3          | 3                     | 3                        | 3                                    |
| SQR                  | 1.73           | 1.73             | 1.73           | 1.73       | 1.73                  | 1.73                     | 1.73                                 |
| SE                   | 0.05           | 0.03             | 0.01           | 0.00       | 0.03                  | 0.03                     | 0.02                                 |

|               |      |      |      |      |              |              |               |
|---------------|------|------|------|------|--------------|--------------|---------------|
| <b>SE %</b>   | 5.39 | 2.78 | 1.35 | 0.20 | 2.74         | 3.00         | 2.10          |
| <b>T Test</b> |      |      |      |      | <b>0.001</b> | <b>0.002</b> | <b>0.0003</b> |
|               |      |      |      |      | <b>0.007</b> |              |               |
|               |      |      |      |      |              | <b>0.002</b> | <b>0.0004</b> |

**Table S7.** Determining the Amount of Caspase-8 in Salubrinal + 6OHDA-treated dDCNs.

|                                 | <b>Mean untreated</b> | <b>Mean salubrinal</b> | <b>Mean 6OHDA</b> | <b>Mean 6OHDA &amp;salubrinal</b> |
|---------------------------------|-----------------------|------------------------|-------------------|-----------------------------------|
| <b>Caspase-8 Assay 1</b>        | 0.970                 | 0.945                  | 1.876             | 1.359                             |
| <b>Caspase-8 Assay 2</b>        | 0.980                 | 1.082                  | 1.336             | 2.154                             |
| <b>Caspase-8 Assay 3</b>        | 0.912                 | 0.968                  | 1.473             | 1.520                             |
| <b>Caspase-8 Assay 4</b>        | 0.871                 | 0.830                  | 1.954             | 2.373                             |
| <b>Active Caspase-8 Assay 5</b> | 0.974                 | 1.485                  | 1.861             | 1.543                             |
| <b>Mean of All Assays</b>       | 0.941                 | 1.062                  | 1.700             | 1.790                             |
| <b>Mean of All Assays %</b>     | <b>100</b>            | <b>113</b>             | <b>181</b>        | <b>190</b>                        |
| <b>SD</b>                       | 0.048                 | 0.253                  | 0.276             | 0.445                             |
| <b>SD (%)</b>                   | 4.79                  | 25.28                  | 27.63             | 44.49                             |
| <b>T Test</b>                   |                       |                        | <b>0.003</b>      | <b>0.713</b>                      |
